# Supplementary material
Source: publisher figshare collection journal article supplement (https://acs.figshare.com/ndownloader/files/23660082)
Supplement: Supplementary file 1 [file 23660082]

## Sheet: Table S1
	Table S1. Numbers of rdhA genes sharing >90% sequence similarities (amino acid level) between strains of the 19 completely-sequenced organohalide-respiring bacteria
	Chloroflexi											Proteobacteria		Firmicutes
	195	VS	CBDB1	BAV1	CG1	CG4	CG5	GY50	11a5	GT	BL-DC-9	SZ	DSM12446	CF	DCA	PER-K23	JW/IU-DC1	DCB-2	Y51
	(17)	(36)	(32)	(11)	(35)	(15)	(26)	(26)	(31)	(20)	(25)	(2)	(2)	(17)	(17)	(25)	(6)	(7)	(2)
195		7	9	3	8	9	10	7	12	7	0	0	0	0	0	0	0	0	0
(pceA)
VS	7		18	7	24	8	18	12	18	17	0	0	0	0	0	0	0	0	0
(vcrA)										(vcrA)
CBDB1	9	17		4	15	9	24	14	23	19	0	0	0	0	0	0	0	0	0
(cbrA)
BAV1	3	7	4		3	2	2	5	4	1	0	0	0	0	0	0	0	0	0
(bvcA)
CG1	8	24	16	2		7	15	17	18	14	0	0	0	0	0	0	0	0	0
(pcbA1)	(1)						(1)	(1)	(1)
CG4	9	8	9	2	7		8	6	9	7	0	0	0	0	0	0	0	0	0
(pcbA4)	(1)						(pcbA5)		(1)	(1)
CG5	10	18	25	2	15	8		12	24	21	0	0	0	0	0	0	0	0	0
(pcbA5)	(1)					(pcbA4)			(1)	(1)
GY50	7	12	14	5	17	6	12		15	9	0	0	0	0	0	0	0	0	0
(pbrA)		(1)	(1)		(3)	(1)	(1)		(1)	(1)
11a5	12	18	24	4	18	9	24	15		20	0	0	0	0	0	0	0	0	0
(pteA)
GT	7	17	20	1	14	7	21	9	20		0	0	0	0	0	0	0	0	0
(vcrA)		(vcrA)
BL-DC-9	0	0	0	0	0	0	0	0	0	0		0	0	0	0	0	0	0	0
(dcpA)
SZ	0	0	0	0	0	0	0	0	0	0	0		0	0	0	0	0	0	0
(pceA)
DSM12446	0	0	0	0	0	0	0	0	0	0	0	0		0	0	0	0	0	0
(pceA)
CF	0	0	0	0	0	0	0	0	0	0	0	0	0		19	7	0	1	2
(cfrA)
DCA	0	0	0	0	0	0	0	0	0	0	0	0	0	19		7	0	1	2
(dcrA)
PER-K23	0	0	0	0	0	0	0	0	0	0	0	0	0	7	7		0	0	4
(pceA)
JW/JU-DC1	0	0	0	0	0	0	0	0	0	0	0	0	0	0	0	1		1	0
(cprA)
DCB-2	0	0	0	0	0	0	0	0	0	0	0	0	0	1	1	1	1		0
(cprA)
Y51	0	0	0	0	0	0	0	0	0	0	0	0	0	2	3	4	0	0
(pceA)

## Sheet: Table S2
	Table S2. Abbreviations of the 174 sampling urban rivers
Provinces/Municipalities	Cities	Sample name	abbreviation	Provinces/Municipalities	Cities	Sample name	abbreviation	Provinces/Municipalities	Cities	Sample name	abbreviation
Hainan	Haikou	Haikou 1	HK1	Yunnan	Kunming	Kunming 2	KM2	Gansu	Dunhuang	Dunhuang 1	DH1
		Haikou 2	HK2			Kunming 3	KM3			Dunhuang 2	DH2
		Haikou 3	HK3		Yuxi	Yuxi 1	YX1		Zhangye	Zhangye 1	ZY1
Guangdong	Guangzhou	Guangzhou 1	GZ1			Yuxi 2	YX2			Zhangye 2	ZY2
		Guangzhou 2	GZ2	Guizhou	Guiyang	Guiyang	GY	Ningxia	Yinchuan	Yinchuan 1	YC1
		Guangzhou 3	GZ3		Anshun	Anshun 1	AS1			Yinchuan 2	YC2
		Guangzhou 4	GZ4			Anshun 2	AS2			Yinchuan 3	YC3
		Guangzhou 5	GZ5			Anshun 3	AS3		Wuzhong	Wuzhong 1	WZ1
		Guangzhou 6	GZ6	Sichuan	Chengdu	Chengdu 1	CD1			Wuzhong 2	WZ2
		Guangzhou 7	GZ7			Chengdu 2	CD2		Shizuishan	Shizuishan	SZS
		Guangzhou 8	GZ8			Chengdu 3	CD3	Inner Mongolia	Hohhot	Hohhot 2	HS2
		Guangzhou 10	GZ10			Chengdu 4	CD4			Hohhot 3	HS3
	Qingyuan	Qingyuan1	QY1			Chengdu 6	CD6		Baotou	Baotou 1	BT1
		Qingyuan2	QY2		Neijiang	Neijiang 1	NJ1			Baotou 2	BT2
		Qingyuan3	QY3			Neijiang 2	NJ2		Bayannaoer	Bayannaoer 1	BY1
		Qingyuan4	QY4		Guangyuan	Guangyuan 1	GY1			Bayannaoer 2	BY2
	Zhanjiang	Zhanjiang 1	ZJ1			Guangyuan 2	GY2	Shaanxi	Xi'an	Xi'an	XA
		Zhanjiang 2	ZJ2	Chongqing	Chongqing	Chongqing 1	CQ1		Weinan	Weinan	WN
		Zhanjiang 3	ZJ3			Chongqing 2	CQ2	Shanxi	Taiyuan	Taiyuan 1	TY1
	Yangjiang	Yangjiang 1	YJ1			Chongqing 3	CQ3			Taiyuan 2	TY2
		Yangjiang 2	YJ2	Hunan	Changsha	Changsha 1	CS1			Taiyuan 3	TY3
		Yangjiang 3	YJ3			Changsha 2	CS2	Shandong	Jinan	Jinan 2	JN2
	Shantou	Shantou 1	ST1			Changsha 3	CS3			Jinan 3	JN3
		Shantou 2	ST2			Changsha 4	CS4			Jinan 4	JN4
	Shenzhen	Shenzhen	SZ		Hengyang	Hengyang 1	HY1		Qingdao	Qingdao 1	QD1
	Huizhou	Huizhou	HZ			Hengyang 2	HY2			Qingdao 2	QD2
Guangxi	Nanning	Nanning 1	NN1		Yongzhou	Yongzhou 1	YZ1		Heze	Heze 1	HZ1
		Nanning 3	NN3			Yongzhou 2	YZ2			Heze 2	HZ2
	Guigang	Guigang	GG		Yueyang	Yueyang 1	YY1			Heze 3	HZ3
Fujian	Fuzhou	Fuzhou 1	FZ1			Yueyang 2	YY2		Linyi	Linyi	LY
		Fuzhou 2	FZ2	Hubei	Wuhan	Wuhan 1	WH1	Hebei	Shijiazhuang	Shijiazhuang 1	SJZ1
		Fuzhou 4	FZ4			Wuhan 2	WH2			Shijiazhuang 2	SJZ2
	Xiamen	Xiamen 1	XM1			Wuhan 3	WH3		Qinhuangdao	Qinhuangdao	QHD
		Xiamen 2	XM2		Jingzhou	Jingzhou 1	JZ1	Beijing	Beijing	Beijing 1	BJ1
		Xiamen 3	XM3			Jingzhou 2	JZ2			Beijing 2	BJ2
	Longyan	Longyan	LY		Suizhou	Suizhou 1	SZ1			Beijing 3	BJ3
	Zhangzhou	Zhangzhou	ZZ			Suizhou 2	SZ2			Beijing 4	BJ4
Jiangxi	Nanchang	Nanchang 1	NC1	Anhui	Hefei	Hefei	HF		Tongzhou	Tongzhou 2	TZ2
		Nanchang 2	NC2		Wuhu	Wuhu 1	WH1	Tianjin	Tianjin	Tianjin 1	TJ1
		Nanchang 3	NC3			Wuhu 2	WH2			Tianjin 2	TJ2
		Nanchang 4	NC4			Wuhu 3	WH3			Tianjin 3	TJ3
		Nanchang 7	NC7		Fuyang	Fuyang	FY	Liaoning	Shenyang	Shenyang 1	SY1
Jiangsu	Nanjing	Nanjing 1	NJ1		Maanshan	Maanshan	MAS			Shenyang 2	SY2
		Nanjing 2	NJ2	Henan	Zhengzhou	Zhengzhou 1	ZZ1			Shenyang 3	SY3
		Nanjing 3	NJ3			Zhengzhou 2	ZZ2		Yingkou	Yingkou 1	YK1
		Nanjing 4	NJ4		Xinyang	Xinyang 1	XY1			Yingkou 2	YK2
	Yangzhou	Yangzhou 1	YZ1			Xinyang 3	XY3		Huludao	Huludao	HLD
		Yangzhou 2	YZ2			Xinyang 4	XY4	Jilin	Jilin	Jilin 1	JL1
		Yangzhou 3	YZ3		Anyang	Anyang	AY			Jilin 2	JL2
		Yangzhou 4	YZ4		Kaifeng	Kaifeng 1	KF1		Changchun	Changchun 1	CC1
	Wuxi	Wuxi 1	WX1			Kaifeng 2	KF2			Changchun 2	CC2
		Wuxi 2	WX2	Qinghai	Delingha	Delingha	DLH			Changchun 3	CC3
	Xuzhou	Xuzhou 1	XZ1		Xining	Xining	XN			Changchun 4	CC4
		Xuzhou 2	XZ2	Gansu	Lanzhou	Lanzhou 1	LZ1		Siping	Siping	SP
Shanghai	Shanghai	Shanghai 1	SH1			Lanzhou 2	LZ2	Heilongjiang	Harbin	Harbin	HRB
		Shanghai 2	SH2		Tianshui	Tianshui 1	TS1		Daqing	Daqing 1	DQ1
		Shanghai 3	SH3			Tianshui 2	TS2			Daqing 2	DQ2
Yunnan	Kunming	Kunming 1	KM1			Tianshui 3	TS3		Qiqihar	Qiqihar	QQHR
Note: the number means different sediments were sampled in a same city, for example, HK1, HK2 and HK3 mean three different sediments sampled in HaiKou city.

## Sheet: Table S3
Table S3. Reductive dechlorination of PCB180 and its dechlorinaiton products in the 135 sediment-free cultures.
Provinces/Municipalities	Samplesb	Dechlorinated PCB180a (mol%)	Dechlorination products from dechlorination of PCB 180a (mol%)
			PCB153	PCB146	PCB101	PCB92
Hainan	HK1	49.76	0	49.7597	0	0
	HK2	15.4867	15.4867	0	0	0
	HK3	93.6551	0	93.6551	0	0
Guangdong	GZ1	75.4808	0	72.4429	0	3.03784
	GZ2	60.5757	0	60.5757	0	0
	GZ3	59.0611	0	59.0611	0	0
	GZ4	63.5573	0	63.5573	0	0
	GZ5	40.5151	10.9634	29.5518	0	0
	GZ6	55.9499	2.2942	53.6557	0	0
	GZ7	62.91	0	62.91	0	0
	GZ8	53.0306	0	53.0306	0	0
	GZ10	60.0628	3.81499	56.2478	0	0
	QY2	68.5599	58.9882	9.57168	0	0
	QY3	87.9273	87.9273	0	0	0
	QY4	32.672	21.8994	10.7726	0	0
	ZJ3	57.8386	1.82409	51.7215	0	4.29301
	YJ1	54.2388	0	54.2388	0	0
	YJ3	47.5738	0	47.5738	0	0
	ST1	63.5706	0	63.5706	0	0
	ST2	51.8745	4.33429	42.5381	1.71907	3.2831
	SZ	59.2067	0	59.2067	0	0
	HZ	73.3897	0	73.3897	0	0
Guangxi	NN1	73.0506	0	73.0506	0	0
	NN3	18.293	0	18.293	0	0
	GG	39.5897	30.5164	9.0733	0	0
Fujian	FZ1	51.8033	0	51.8033	0	0
	FZ2	84.5248	0	84.5248	0	0
	FZ4	51.5515	0	51.5515	0	0
	XM3	99.993	0	99.993	0	0
	LY	43.4713	2.21563	41.2557	0	0
	ZZ	50.4022	0	50.4022	0	0
Jiangxi	NC1	34.5422	1.58045	30.0442	0	2.91749
	NC2	80.9302	2.59365	71.8832	0	6.45336
	NC4	42.7712	0.662038	42.1092	0	0
	NC7	59.7999	2.31638	57.4835	0	0
Jiangsu	NJ1	75.1971	0	75.1971	0	0
	NJ2	47.4201	0	47.4201	0	0
	NJ3	67.5776	0	67.5776	0	0
	YZ1	65.2503	0	65.2503	0	0
	YZ3	69.5284	0	69.5284	0	0
	YZ4	85.9059	0	65.4516	0	20.4543
	WX1	84.6597	2.45791	80.5061	0	1.69565
	WX2	67.5465	3.24239	64.3041	0	0
	XZ1	83.7318	0	27.0408	56.691	0
	XZ2	51.7738	0.660267	51.1135	0	0
Shanghai	SH1	62.7486	0.880274	59.1683	0	2.69997
	SH3	88.4749	0	88.4749	0	0
Yunnan	KM1	60.0153	0	60.0153	0	0
	KM2	33.2899	0	33.2899	0	0
	KM3	70.959	0	70.959	0	0
	YX1	77.9451	0	77.9451	0	0
	YX2	71.6634	0	71.6634	0	0
Guizhou	AS2	82.4152	0	82.4152	0	0
	AS3	88.0292	34.2302	48.7362	3.0342	2.02857
Sichuan	CD1	36.9043	0	36.9043	0	0
	CD2	66.4562	0	66.4562	0	0
	CD3	65.3119	0	65.3119	0	0
	CD4	61.847	0	61.847	0	0
	CD6	48.1349	0	48.1349	0	0
	NJ1	66.2784	0	66.2784	0	0
	NJ2	17.961	0	17.961	0	0
	GY1	65.0998	0	65.0998	0	0
Chongqing	CQ1	87.5484	0	87.5484	0	0
	CQ2	86.9235	0	86.9235	0	0
	CQ3	99.572	0	99.572	0	0
Hunan	CS1	28.7294	0	28.7294	0	0
	CS2	44.2267	2.94143	41.2853	0	0
	HY1	94.9583	5.73673	74.0586	3.47547	11.6875
	HY2	72.7041	0	15.4379	0	57.2662
	YZ2	62.4592	0	62.4592	0	0
	YY1	44.4769	1.91351	42.5634	0	0
	YY2	43.845	0	43.845	0	0
Hubei	WH1	21.9978	0.536146	21.4616	0	0
	WH2	55.6276	0	55.6276	0	0
	WH3	58.7258	0	58.7258	0	0
	JZ1	99.932	13.453	86.479	0	0
	JZ2	55.1261	36.2222	18.9039	0	0
	SZ1	16.9496	0	16.9496	0	0
	SZ2	36.5989	0	36.5989	0	0
Anhui	HF	79.4289	8.20872	71.2202	0	0
	WH1	84.4197	2.48153	72.5105	0	9.42765
	WH2	89.9871	0	89.9871	0	0
	WH3	19.3895	0	19.3895	0	0
	FY	56.4283	0.69971	55.7286	0	0
	MAS	68.9256	0.887567	68.0381	0	0
Henan	ZZ1	47.3213	0	47.3213	0	0
	ZZ2	74.8429	0	12.584	0	62.2588
	XY3	83.9097	0.386603	82.7465	0	0.776526
	XY4	86.9578	0	84.0826	0	2.87519
	AY	72.2606	0	53.2327	0	19.0279
	KF1	82.2963	4.82602	77.4703	0	0
	KF2	92.4322	0	92.4322	0	0
Gansu	LZ1	60.6712	0	57.8062	0	2.86501
	LZ3	70.7387	0	70.7387	0	0
	TS1	95.7371	24.1006	69.1809	2.45565	0
	TS2	83.2825	2.89005	65.9248	2.15132	12.3164
	ZY1	81.7826	8.21051	73.5721	0	0
Ningxia	WZ1	59.6496	2.59957	57.0501	0	0
	SZS	90.3917	0	90.3917	0	0
Inner Mongolia	HS2	64.7418	0	64.7418	0	0
	HS3	36.3393	0	36.3393	0	0
	BT1	57.8763	0	57.8763	0	0
	BT2	74.2515	11.9584	62.2931	0	0
	BY1	12.8208	2.16039	10.6604	0	0
Shaanxi	WN	56.4414	43.9318	12.5096	0	0
Shanxi	TY1	47.8707	0	47.8707	0	0
	TY2	63.5634	0	63.5634	0	0
	TY3	66.6298	8.40325	58.2265	0	0
Shandong	JN4	59.4055	0	59.4055	0	0
	QD1	71.1356	69.5296	1.60606	0	0
	HZ1	53.5	9.48	44.02	0	0
	HZ2	8.57215	8.57215	0	0	0
	HZ3	72.9025	49.1201	8.22047	9.8044	5.75759
	LY	43.2018	32.9878	10.214	0	0
Hebei	SJZ1	39.4599	0	39.4599	0	0
	SJZ2	61.6188	1.30971	23.3127	0	36.9964
	QHD	41.265	32.2584	9.00663	0	0
Beijing	BJ2	20.4316	0	20.4316	0	0
	BJ3	40.2414	30.727	9.51431	0	0
	BJ4	29.6775	0	29.6775	0	0
	TZ2	52.5605	0	52.5605	0	0
Tianjin	TJ1	82.0298	2.90378	79.126	0	0
	TJ2	75.3457	73.1215	2.2242	0	0
Liaoning	SY1	37.519	0	37.519	0	0
	SY2	49.7255	0	49.7255	0	0
	SY3	71.777	0	71.777	0	0
	YK1	69.1436	13.1242	56.0194	0	0
	YK2	88.9748	0	88.9748	0	0
Jilin	JL1	54.3266	3.8679	50.4587	0	0
	JL2	59.7367	0	59.7367	0	0
	CC1	34.1848	0	34.1848	0	0
	CC2	64.7463	0	64.7463	0	0
	CC3	55.5445	0	55.5445	0	0
	CC4	51.5174	0	51.5174	0	0
	SP	36.5383	5.51217	31.0262	0	0
Note: samples are listed in the same sequence with sample shown in figure 3; red, para-dechlorination products; blue, meta-dechlorination products, black, products from both para- and meta-dechlorination.
a the concentration of amended PCB180 in the medium is 2.53 µM;
b refer sample abbreviations in Table S2;

## Sheet: Table S4
	Table S4. The PCE-dechlorinating OHRB and their dechlorinaiton of aromatic organohalides
Dehalogenating bacteriumb		Aromatic organohalides	PCE dechlorination products	Identified RDases	Referencesc
Obligate	Dehalococcoides mccartyi 195	PCBs, HCB, 2,3-DCP	cis-DCE, VC, (Ethene)a	PceA, TceA	Maymó-Gatell et al., 1997, 2001; Löffler et al., 2013; Seshadri et al., 2005; Fennell et al., 2004; Adrian et al., 2007
	Dehalococcoides mccartyi CBDB1	PCBs, HCB, 1,3,5-DCB, Dioxins, PeCP, BBs	cis-DCE < trans-DCE (~1/3.4)	PceA, CbrA	Adrian et al., 2000, 2007, 2009; Bunge et al., 2003; Jayachandran et al., 2003; Wagner et al., 2012; Marco-Urrea et al., 2011
	Dehalococcoides mccartyi 11a5	NA	cis-DCE, trans-DCE	TceA, PteA	Lee et al., 2013; Zhao et al., 2016
	Dehalococcoides mccartyi MB	NA	cis-DCE < trans-DCE (~1/7.3)	MbrA	Cheng and He, 2009
	Dehalococcoides mccartyi CG1	PCBs	cis-DCE < trans-DCE	PcbA1	Wang et al., 2014a
	Dehalococcoides mccartyi CG4	PCBs	cis-DCE < trans-DCE	PcbA4	Wang et al., 2014a
	Dehalococcoides mccartyi CG5	PCBs	cis-DCE < trans-DCE	PcbA5	Wang et al., 2014a
	Dehalococcoides mccartyi JNA	PCBs	cis-DCE > trans-DCE (~2.5/1)	JNA-RD5, JNA_RD8, JNA_RD11	Wang, et al., 2015; Bedard et al., 2006; LaRoe et al., 2014; Fricker et al., 2014
	Dehalococcoides mccartyi CG3	PCBs	cis-DCE, trans-DCE	CG3-RD11	Wang et al., 2019
	Dehalococcoides mccartyi SG1	PCBs	cis-DCE, trans-DCE	SG1-RD28	Wang et al., 2019
	Dehalobium DF-1	PCBs, HCB	cis-DCE < trans-DCE	NA	Wu et al., 2002; May et al., 2008a, 2008b; Miller et al., 2005
	Dehalobacter restrictus PER-K23	NA	cis-DCE	PceA	Kruse et al., 2013; Holliger et al., 1993, 1998; Maillard et al., 2003
	Dehalobacter restrictus TEA	NA	cis-DCE	NA	Wild et al., 1996
	Dehalobacter sp. DCB1	CBs, DCTs	cis-DCE	NA	Nelson et al., 2011, 2014
	Dehalobacter sp. TCP1	2,4,6-TCP	cis-DCE > trans-DCE(~5.6/1)	DebcprA	Wang et al., 2014b
Non-obligate	Desulfitobacterium dehalogenans JW/IU-DC1	Cl-OHPA, PeCP, TeCPs, 2,3,4-/2,3,6-/2,4,6-TCPs, 2,3-/2,4-/2,6-DCPs, TCMP, TCHQ, 2,6-dichloro-4-R-phenol (R: -H, -Cl, -F, -NO2, -COOH, -COOCH3), 2-chloro-4-R-phenol (R: -Cl, -F, -Br, -NO2, -COOH, -COOCH3, -CH2COOH), 3,3″5,5″ tetrachloro-4,4 dihydroxybiphenyl congeners, 3,4″5-trichloro-4- hydroxybiphenyl, 3,5-dichloro-4-hydroxybiphenyl, 2,6-DBP, 2-BP, 2-bromo-4-CP, 2-bromo-4-methylphenol	cis-DCE	CprA	Utkin et al.,1994, 1995; Wiegel et al., 1999; Gerritse et al., 1999; Milliken et al., 2004b
	Desulfitobacterium hafniense DCB-2	Cl-OHPA, PeCP, 2,3,4,5-TeCP, 2,4,5-/2,4,6-TCPs, 2,3-/2,4-/3,5-DCPs, TCMP, TCHQ	cis-DCE	CprA	Madsen and Licht, 1992; Christiansen et al., 1996; Gerritse et al., 1999; Milliken et al., 2004b; Mac Nelly et al., 2014
	Desulfitobacterium hafniense TCP-A	PeCP, 2,3,4,5-/2,3,5,6-TeCPs, 2,3,5-/2,4,6-TCPs, 2,3-/2,4-/3,5-DCPs, 2-CP (weak activity)	TCE	NA	Breitenstein et al., 2001; Mingo et al., 2014
	Desulfitobacterium hafniense TCE1	NA	cis-DCE	PceA	Gerritse et al., 1999; Luijten et al., 2004; Tsukagoshi et al., 2006; Maillard et al., 2005; Milliken et al., 2004b
	Desulfitobacterium hafniense PCP-1	PeCP, 2,3,4,5-/2,3,5,6-TeCPs, 2,3,4-/2,3,5-/2,3,6-/2,4,5-/2,4,6-/3,4,5-TCPs, 2,4-/2,6-/3,5-DCPs, TCMP, TCHQ, 3,5-dichloro-4-hydroxybi-phenyl; polychlorinated catechol, guaiacol, veratrole, anisole, aniline, nitrobenzene and pyridine; 2,4,6-tribromophenol, 2,4-DBP	TCE	NA	Bouchard et al., 1996; Niggemyer et al., 2001; Mingo et al., 2014
	Desulfitobacterium hafniense Y51	NA	cis-DCE	PceA	Kruse et al., 2015; Suyama et al., 2001, 2002; Furukawa et al., 2005
	Desulfitobacterium hafniense PCE-S	NA	cis-DCE	PceA	Tsukagoshi et al., 2006; Miller et al., 1997; Neumann et al., 2004; Ye et al., 2010; Mingo et al., 2014; Goris et al., 2015
	Desulfitobacterium hafniense G2	NA	cis-DCE	NA	Shelobolina et al., 2003
	Desulfitobacterium hafniense JH1	NA	cis-DCE	NA	Fletcher et al., 2008
	Desulfitobacterium metallireducens 853-15A	Cl-OHPA	cis-DCE	NA	Finneran et al., 2002
	Desulfitobacterium sp. Viet-1	2,4,6-TCP, 2,4-DCP	TCE	NA	Löffler et al., 1997; Tront et al., 2006
	Desulfitobacterium sp. B31e3	NA	cis-DCE	NA	Yoshida et al., 2007
	Desulfitobacterium sp. KBC1	2,4,6-TCP, 2,4-DCP	TCE	PrdA	Tsukagoshi et al., 2006
	Desulfitobacterium sp. PR	NA	TCE	CtrA	Ding et al., 2014; Zhao et al., 2015
	Desulfitobacterium sp. PCE1	Cl-OHPA, 2,3,5,6-TeCP, 2,4,6-TCP, 2,4-DCP, 2-CP, TCMP, TCHQ, 2,3,5-trichlorohydroquinone	TCE	PceA, CprA	Tsukagoshi et al., 2006; Gerritse et al., 1996; Lie et al., 1999; Luijten et al., 2004; Fletcher et al., 2010; Milliken et al., 2004a, 2004b
	Sulfurospirillum halorespirans PCE-M2	NA	cis-DCE	NA	Luijten et al., 2003
	Sulfurospirillum multivorans K	NA	cis-DCE	PceA	Scholz-Muramatsu et al., 1995; Neumann et al., 1998
	Sulfurospirillum multivorans DSM12446	NA	cis-DCE	NA	Neumann et al., 1994; Scholz-Muramatsu et al., 1995; Luijten et al., 2003
	Sulfurospirillum carboxydovorans MV	NA		NA	Jensen and Finster, 2005
	Geobacter lovleyi SZ	NA	cis-DCE	PceA	Sung et al., 2006
	Desulfuromonas chloroethenica TT4B	NA	cis-DCE	NA	Krumholz, 1997
	Desulfuromonas michiganensis BB1	NA	cis-DCE	NA	Sung et al., 2003
	Desulfuromonas michiganensis BRS1	NA	cis-DCE	NA	Sung et al., 2003
	Shewanella sediminis HAW-EB3	NA	TCE	NA	Zhao et al., 2005; Lohner and Spormann, 2013
Note: PCE, tetrachloroethene; TCE, trichloroethene; DCE, dichloroethene; VC, vinyl chloride; PCBs, polychlorinated biphenyls; HCB, hexachlorobenzene; PeCP, pentachlorophenol; TeCP, tetrachlorophenol; TCP, trichlorophenol; DCP, dichlorophenol; CP, chlorophenol; DBP, dibromophenol; BP, bromophenol; CBs, Chlorobenzenes; DCB, dixhlorobenzene; BBs, bromobenzenes; DCTs, Dichlorotoluenes; Cl-OHPA, 3-chl…
a VC → Ethene, cometabolic process.
b Only the bacteria with PCE dechlorination were selected.
NA, not available.
c References
1	Adrian L, Hansen SK, Fung JM, Görisch H, Zinder SH (2007) Growth of Dehalococcoides strains with chlorophenols as electron acceptors. Environ Sci Technol 41(7):2318–2323
2	Adrian L, Dudkova V, Demnerova K, Bedard DL (2009) “Dehalococcoides” sp. strain CBDB1 extensively dechlorinates the commercial polychlorinated biphenyl mixture aroclor 1260. Appl Environ Microbiol 75(13):4516–4524. doi:10.1128/AEM.00102-09
3	Adrian L, Szewzyk U, Wecke J, Görisch H (2000) Bacterial dehalorespiration with chlorinated benzenes. Nature 408(6812):580–583
4	Bedard DL, Bailey JJ, Reiss BL, Jerzak GVS (2006) Development and characterization of stable sediment-free anaerobic bacterial enrichment cultures that dechlorinate Aroclor 1260. Appl Environ Microbiol 72(4):2460–2470
5	Bouchard B, Beaudet R, Villemur R, McSween G, Lepine F, Bisaillon J-G (1996) Isolation and characterization of Desulfitobacterium frappieri sp. nov., an anaerobic bacterium which reductively dechlorinates pentachlorophenol to 3-chlorophenol. Int J Syst Bacteriol 46(4):1010–1015
6	Breitenstein A, Saano A, Salkinoja-Salonen M, Andreesen JR, Lechner U (2001) Analysis of a 2,4,6-trichlorophenol-dehalogenating enrichment culture and isolation of the dehalogenat- ing member Desulfitobacterium frappieri strain TCP-A. Arch Microbiol 175:133–142
7	Bunge M, Adrian L, Kraus A, Opel M, Lorenz WG, Andreesen JR, Görisch H, Lechner U (2003) Reductive dehalogenation of chlorinated dioxins by an anaerobic bacterium. Nature 421(6921):357–360
8	Cheng D, He JZ (2009) Isolation and characterization of “Dehalococcoides” sp. strain MB, which dechlorinates tetrachloroethene to trans-1,2-dichloroethene. Appl Environ Microbiol 75(18):5910–5918. doi:10.1128/Aem.00767-09
9	Christiansen N, Ahring BK (1996) Desulfitobacterium hafniense sp. nov., an anaerobic, reduc- tively dechlorinating bacterium. Int J Syst Bacteriol 46:442–448. doi:10.1099/00207713- 46-2-442
10	Ding C, Zhao S, He J (2014) A Desulfitobacterium sp. strain PR reductively dechlorinates both 1,1,1-trichloroethane and chloroform: strain PR dechlorinates TCA and chloroform. Environ Microbiol 16(11):3387–3397. doi:10.1111/1462-2920.12387
11	Fennell DE, Nijenhuis I, Wilson SF, Zinder SH, Häggblom MM (2004) Dehalococcoides ethe- nogenes strain 195 reductively dechlorinates diverse chlorinated aromatic pollutants. Environ Sci Technol 38(7):2075–2081
12	Finneran KT, Forbush HM, VanPraagh CVG, Lovley DR (2002) Desulfitobacterium metallire - ducens sp. nov., an anaerobic bacterium that couples growth to the reduction of metals and humic acids as well as chlorinated compounds. Int J Syst Evol Microbiol 52:1929–1935
13	Fletcher KE, Boyanov MI, Thomas SH, Wu Q, Kemner KM, Löffler FE (2010) U(VI) reduction to mononuclear U(IV) by Desulfitobacterium species. Environ Sci Technol 44:4705–4709. doi:10.1021/es903636c
14	Fletcher KE, Ritalahti KM, Pennell KD, Takamizawa K, Löffler FE (2008) Resolution of cul- ture Clostridium bifermentans DPH-1 into two populations, a Clostridium sp. and tetrachlo- roethene-dechlorinating Desulfitobacterium hafniense strain JH1. Appl Environ Microbiol 74:6141–6143. doi:10.1128/AEM.00994-08
15	Fricker AD, LaRoe SL, Shea ME, Bedard DL (2014) Dehalococcoides mccartyi strain JNA dechlorinates multiple chlorinated phenols including pentachlorophenol and harbors at least 19 reductive dehalogenase homologous genes. Env Sci Technol 48(24):14300–14308. doi:10.1021/es503553f
16	Furukawa K, Suyama A, Tsuboi Y, Futagami T, Goto M (2005) Biochemical and molecular characterization of a tetrachloroethene dechlorinating Desulfitobacterium sp. strain Y51: a review. J Ind Microbiol Biotechnol 32:534–541. doi:10.1007/s10295-005-0252-z
17	Gerritse J, Renard V, Pedro Gomes TM, Lawson PA, Collins MD, Gottschal JC (1996) Desulfitobacterium sp. strain PCE1, an anaerobic bacterium that can grow by reduc- tive dechlorination of tetrachloroethene or ortho-chlorinated phenols. Arch Microbiol 165:132–140
18	Gerritse J, Drzyzga O, Kloetstra G, Keijmel M, Wiersum LP, Hutson R, Collins MD, Gottschal JC (1999) Influence of different electron donors and acceptors on dehalorespiration of tetra - chloroethene by Desulfitobacterium frappieri TCE1. Appl Environ Microbiol 65:5212–5221
19	Goris T, Hornung B, Kruse T, Reinhold A, Westermann M, Schaap PJ, Smidt H, Gabriele Diekert G (2015) Draft genome sequence and characterization of Desulfitobacterium hafniense PCE-S. Stand Genomic Sci 10:15. doi:10.1186/1944-3277-10-15
20	Holliger C, Schraa G, Stams AJM, Zehnder AJB (1993) A highly purified enrichment culture couples the reductive dechlorination of tetrachloroethene to growth. Appl Environ Microbiol 59(9):2991–2997
21	Holliger C, Hahn D, Harmsen H, Ludwig W, Schumacher W, Tindall B, Vazquez F, Weiss N, Zehnder AJ (1998) Dehalobacter restrictus gen. nov. and sp. nov., a strictly anaerobic bac- terium that reductively dechlorinates tetra- and trichloroethene in an anaerobic respiration. Arch Microbiol 169(4):313–321
22	Jayachandran G, Görisch H, Adrian L (2003) Dehalorespiration with hexachloroben- zene and pentachlorobenzene by Dehalococcoides sp. strain CBDB1. Arch Microbiol 180(6):411–416
23	Jensen A, Finster K (2005) Isolation and characterization of Sulfurospirillum carboxydovorans sp nov., a new microaerophilic carbon monoxide oxidizing epsilon proteobacterium. Antonie Van Leeuwenhoek Int J Gen Mol Microbiol 87:339–353. doi:10.1007/s10482-004-6839-y
24	Krumholz LR (1997) Desulfuromonas chloroethenica sp. nov. uses tetrachloroethylene and trichloroethylene as electron acceptors. Int J Syst Evol Microbiol 47:1262–1263. doi:10.1099/00207713-47-4-1262
25	Kruse T, Maillard J, Goodwin L, Woyke T, Teshima H, Bruce D, Detter C, Tapia R, Han C, Huntemann M, Wei CL, Han J, Chen A, Kyrpides N, Szeto E, Markowitz V, Ivanova N, Pagani I, Pati A, Pitluck S, Nolan M, Holliger C, Smidt H (2013) Complete genome sequence of Dehalobacter restrictus PER-K23(T.). Stand Genomic Sci 8 (3):375–388. doi:10.4056/sigs.3787426
26	Kruse T, van de Pas BA, Atteia A, Krab K, Hagen WR, Goodwin L, Chain P, Boeren S, Maphosa F, Schraa G, de Vos WM, van der Oost J, Smidt H, Stams AJM (2015) Genomic, proteomic, and biochemical analysis of the organohalide respiratory pathway in Desulfitobacterium dehalogenans. J Bacteriol 197:893–904. doi:10.1128/JB.02370-14
27	LaRoe SL, Fricker AD, Bedard DL (2014) Dehalococcoides mccartyi strain JNA in pure cul- ture extensively dechlorinates aroclor 1260 according to polychlorinated biphenyl (PCB) Dechlorination Process N. Environ Sci Technol 48(16):9187–9196
28	Lee PK, Cheng D, West KA, Alvarez-Cohen L, He J (2013) Isolation of two new Dehalococcoides mccartyi strains with dissimilar dechlorination functions and their charac- terization by comparative genomics via microarray analysis. Environ Microbiol 15(8):2293– 2305. doi:10.1111/1462-2920.12099
29	Lie TJ, Godchaux W, Leadbetter ER (1999) Sulfonates as terminal electron acceptors for growth of sulfite-reducing bacteria ( Desulfitobacterium spp.) and sulfate-reducing bacteria: effects of inhibitors of sulfidogenesis. Appl Environ Microbiol 65:4611–4617
30	Löffler FE, Ritalahti KM, Tiedje JM (1997) Dechlorination of chloroethenes is inhibited by 2-bro - moethanesulfonate in the absence of methanogens. Appl Environ Microbiol 63:4982–4985
31	Löffler FE, Yan J, Ritalahti KM, Adrian L, Edwards EA, Konstantinidis KT, Müller JA, Fullerton H, Zinder SH, Spormann AM (2013) Dehalococcoides mccartyi gen. nov., sp. nov., obligately organohalide-respiring anaerobic bacteria relevant to halogen cycling and bioremediation, belong to a novel bacterial class, Dehalococcoidia classis nov., order Dehalococcoidales ord. nov. and family Dehalococcoida…
32	Lohner ST, Spormann AM (2013) Identification of a reductive tetrachloroethene dehalogenase in Shewanella sediminis. Philos Trans R Soc Lond B Biol Sci 368:20120326. doi:10.1098/r stb.2012.0326
33	Luijten ML, de Weert J, Smidt H, Boschker HT, de Vos WM, Schraa G, Stams AJ (2003) Description of Sulfurospirillum halorespirans sp. nov., an anaerobic, tetrachloroe- thene-respiring bacterium, and transfer of Dehalospirillum multivorans to the genus Sulfurospirillum as Sulfurospirillum multivorans comb. nov. Int J Syst Evol Microbiol 53 (3):787–793
34	Luijten ML, Roelofsen W, Langenhoff AA, Schraa G, Stams AJ (2004) Hydrogen threshold concentrations in pure cultures of halorespiring bacteria and at a site polluted with chlorin- ated ethenes. Environ Microbiol 6:646–650. doi:10.1111/j.1462-2920.2004.00608.x
35	Mac Nelly A, Kai M, Svatoš A, Diekert G, Schubert T (2014) Functional heterologous produc- tion of reductive dehalogenases from Desulfitobacterium hafniense strains. Appl Environ Microbiol 80:4313–4322. doi:10.1128/AEM.00881-14
36	Madsen T, Licht D (1992) Isolation and characterization of an anaerobic chlorophenol-transform- ing bacterium. Appl Environ Microbiol 58:2874–2878
37	Maillard J, Schumacher W, Vazquez F, Regeard C, Hagen WR, Holliger C (2003) Characterization of the corrinoid iron-sulfur protein tetrachloroethene reductive dehaloge- nase of Dehalobacter restrictus. Appl Environ Microbiol 69:4628–4638
38	Maillard J, Regeard C, Holliger C (2005) Isolation and characterization of Tn-Dha1, a transpo- son containing the tetrachloroethene reductive dehalogenase of Desulfitobacterium hafniense strain TCE1. Environ Microbiol 7:107–117. doi:10.1111/j.1462-2920.2004.00671.x
39	Marco-Urrea E, Nijenhuis I, Adrian L (2011) Transformation and carbon isotope fractionation of tetra- and trichloroethene to trans-dichloroethene by Dehalococcoides sp. strain CBDB1. Environ Sci Technol 45:1555–1562
40	May HD, Miller GS, Kjellerup BV, Sowers KR (2008a) Dehalorespiration with polychlorinated biphenyls by an anaerobic ultramicrobacterium. Appl Environ Microbiol 74(7):2089–2094
41	May HD, Miller GS, Kjellerup BV, Sowers KR (2008b) Author's Correction—Dehalorespiration with polychlorinated biphenyls by an anaerobic ultramicrobacterium. Appl Environ Microbiol 74(19):6169–6170
42	Maymo-Gatell X, Y-t Chien, Gossett JM, Zinder SH (1997) Isolation of a bacterium that reductively dechlorinates tetrachloroethene to ethene. Science 276(5318):1568–1571
43	Miller E, Wohlfarth G, Diekert G (1997) Comparative studies on tetrachloroethene reduc- tive dechlorination mediated by Desulfitobacterium sp. strain PCE-S. Arch Microbiol 168:513–519
44	Miller GS, Milliken CE, Sowers KR, May HD (2005) Reductive dechlorination of tetrachloroe- thene to trans-dichloroethene and cis-dichloroethene by PCB-dechlorinating bacterium DF-1. Environ Sci Technol 39(8):2631–2635
45	Milliken CE, Meier GP, Sowers KR, May HD (2004a) Chlorophenol production by anaerobic microorganisms: transformation of a biogenic chlorinated hydroquinone metabolite. Appl Environ Microbiol 70(4):2494–2496. doi:10.1128/aem.70.4.2494-2496.2004
46	Milliken CE, Meier GP, Watts JEM, Sowers KR, May HD (2004b) Microbial anaerobic demeth- ylation and dechlorination of chlorinated hydroquinone metabolites synthesized by basidi- omycete fungi. Appl Environ Microbiol 70:385–392
47	Mingo FS, Studenik S, Diekert G (2014) Conversion of phenyl methyl ethers by Desulfitobacterium spp. and screening for the genes involved. FEMS Microbiol Ecol 90:783–790. doi:10.1111/1574-6941.12433
48	Nelson JL, Jiang J, Zinder SH (2014) Dehalogenation of chlorobenzenes, dichlorotoluenes, and tetrachloroethene by three Dehalobacter spp. Environ Sci Technol 48(7):3776–3782. doi:10.1021/es4044769
49	Nelson JL, Fung JM, Cadillo-Quiroz H, Cheng X, Zinder SH (2011) A role for Dehalobacter spp. in the reductive dehalogenation of dichlorobenzenes and monochlorobenzene. Environ Sci Technol 45(16):6806–6813. doi:10.1021/es200480k
50	Neumann A, Scholz-Muramatsu H, Diekert G (1994) Tetrachloroethene metabolism of Dehalospirillum multivorans. Arch Microbiol 162:295–301
51	Neumann A, Wohlfarth G, Diekert G (1998) Tetrachloroethene dehalogenase from Dehalospirillum multivorans: cloning, sequencing of the encoding genes, and expression of the pceA gene in Escherichia coli. J Bacteriol 180:4140–4145
52	Neumann A, Engelmann T, Schmitz R, Greiser Y, Orthaus A, Diekert G (2004) Phenyl methyl ethers: novel electron donors for respiratory growth of Desulfitobacterium hafniense and Desulfitobacterium sp. strain PCE-S. Arch Microbiol 181:245–249. doi:10.1007/ s00203-004-0651-y
53	Niggemyer A, Spring S, Stackebrandt E, Rosenzweig RF (2001) Isolation and characterization of a novel As (V)-reducing bacterium: implications for arsenic mobilization and the genus Desulfitobacterium . Appl Environ Microbiol 67(12):5568–5580
54	Scholz-Muramatsu H, Neumann A, Messmer M, Moore E, Diekert G (1995) Isolation and char- acterization of Dehalospirillum multivorans gen. nov., sp. nov., a tetrachloroethene-utiliz- ing, strictly anaerobic bacterium. Arch Microbiol 163(1):48–56
55	Seshadri R, Adrian L, Fouts DE, Eisen JA, Phillippy AM, Methe BA, Ward NL, Nelson WC, Deboy RT, Khouri HM, Kolonay JF, Dodson RJ, Daugherty SC, Brinkac LM, Sullivan SA, Madupu R, Nelson KT, Kang KH, Impraim M, Tran K, Robinson JM, Forberger HA, Fraser CM, Zinder SH, Heidelberg JF (2005) Genome sequence of the PCE-dechlorinating bacte- rium Dehalococcoides ethenogenes. Science 307(5706):105–108
56	Shelobolina ES, VanPraagh CG, Lovley DR (2003) Use of ferric and ferrous iron contain- ing minerals for respiration by Desulfitobacterium frappieri. Geomicrobiol J 20:143–156. doi:10.1080/01490450390193255
57	Sung Y, Ritalahti KM, Sanford RA, Urbance JW, Flynn SJ, Tiedje JM, Löffler FE (2003) Characterization of two tetrachloroethene-reducing, acetate-oxidizing anaerobic bacteria and their description as Desulfuromonas michiganensis sp. nov. Appl Environ Microbiol 69:2964–2974
58	Sung Y, Fletcher K, Ritalahti KM, Apkarian RP, Ramos-Hernández N, Sanford RA et al (2006) Geobacter lovleyi sp. nov. strain SZ, a novel metal-reducing and tetrachloroethene-dechlorin- ating bacterium. Appl Environ Microbiol 72:2775–2782
59	Suyama A, Iwakiri R, Kai K, Tokunaga T, Sera N, Furukawa K (2001) Isolation and characteriza- tion of Desulfitobacterium sp strain Y51 capable of efficient dehalogenation of tetrachloro - ethene and polychloroethanes. Biosci Biotechnol Biochem 65(7):1474–1481
60	Suyama A, Yamashita M, Yoshino S, Furukawa K (2002) Molecular characterization of the PceA reductive dehalogenase of Desulfitobacterium sp. strain Y51. J Bacteriol 184:3419–3425
61	Tront JM, Amos BK, Löffler FE, Saunders FM (2006) Activity of Desulfitobacterium sp. strain Viet1 demonstrates bioavailability of 2,4-dichlorophenol previously sequestered by the aquatic plant Lemna minor. Environ Sci Technol 40:529–535. doi:10.1021/es0514545
62	Tsukagoshi N, Ezaki S, Uenaka T et al (2006) Isolation and transcriptional analysis of novel tet- rachloroethene reductive dehalogenase gene from Desulfitobacterium sp. strain KBC1. Appl Microbiol Biotechnol 69:543–553. doi:10.1007/s00253-005-0022-x
63	Tsukagoshi N, Ezaki S, Uenaka T, Suzuki N, Kurane R (2006) Isolation and transcriptional anal- ysis of novel tetrachloroethene reductive dehalogenase gene from Desulfitobacterium sp. strain KBC1. Appl Microbiol Biotechnol 69:543–553. doi:10.1007/s00253-005-0022-x
64	Utkin I, Dalton DD, Wiegel J (1995) Specificity of reductive dehalogenation of substituted ortho- chlorophenols by Desulfitobacterium dehalogenans JW/IU-DC1. Appl Environ Microbiol 61:346–351
65	Utkin I, Woese C, Wiegel J (1994) Isolation and characterization of Desulfitobacterium dehalo - genans gen. nov., sp. nov., an anaerobic bacterium which reductively dechlorinates chloro- phenolic compounds. Int J Syst Bacteriol 44:612–619
66	Wagner A, Cooper M, Ferdi S, Seifert J, Adrian L (2012) Growth of Dehalococcoides mccartyi strain CBDB1 by reductive dehalogenation of brominated benzenes to benzene. Environ Sci Technol 46(16):8960–8968. doi:10.1021/es3003519
67	Wang S, Chen C, Siyan Z, Jianzhong H. 2019. Microbial synergistic interactions for reductive dechlorination of polychlorinated biphenyls. Science of Total Environment 666: 368-376.
68	Wang S, Chng KR, Wilm A, Zhao S, Yang KL, Nagarajan N, He J (2014a) Genomic characteri- zation of three unique Dehalococcoides that respire on persistent polychlorinated biphenyls. Proc Natl Acad Sci USA 111(33):12103–12108
69	Wang S, Zhang W, Yang KL, He J (2014b) Isolation and characterization of a novel Dehalobacter species strain TCP1 that reductively dechlorinates 2,4,6-trichlorophenol. Biodegradation 25(2):313–323. doi:10.1007/s10532-013-9662-1
70	Wang, S., Chng, K.R., Chen, C., Bedard, D.L., He, J., 2015. Genomic characterization of Dehalococcoides mccartyi strain JNA that reductively dechlorinates tetra- chloroethene and polychlorinated biphenyls. Environ. Sci. Technol. 49 (24), 14319e14325.
71	Wiegel J, Zhang X, Wu Q (1999) Anaerobic dehalogenation of hydroxylated polychlorinated biphenyls by Desulfitobacterium dehalogenans. Appl Environ Microbiol 65:2217–2221
72	Wild A, Hermann R, Leisinger T (1996) Isolation of an anaerobic bacterium which reductively dechlorinates tetrachloroethene and trichloroethene. Biodegradation 7(6):507–511
73	Wu Q, Milliken CE, Meier GP, Watts JEM, Sowers KR, May HD (2002) Dechlorination of chlorobenzenes by a culture containing bacterium DF-1, a PCB dechlorinating microorgan- ism. Environ Sci Technol 36(15):3290–3294
74	Ye L, Schilhabel A, Bartram S, Boland W, Diekert G (2010) Reductive dehalogenation of bro- minated ethenes by Sulfurospirillum multivorans and Desulfitobacterium hafniense PCE-S. Environ Microbiol 12:501–509. doi:10.1111/j.1462-2920.2009.02093.x
75	Yoshida N, Asahi K, Sakakibara Y, Miyake K, Katayama A (2007) Isolation and quantitative detection of tetrachloroethene (PCE)-dechlorinating bacteria in unsaturated subsurface soils contaminated with chloroethenes. J Biosci Bioeng 104:91–97. doi:10.1263/jbb.104.91
76	Zhao S, Ding C, He J (2015) Detoxification of 1,1,2-trichloroethane to ethene by desulfito - bacterium and identification of its functional reductase gene. PLoS ONE 10:e0119507. doi:10.1371/journal.pone.0119507
77	Zhao J-S, Manno D, Beaulieu C, Paquet L, Hawari J (2005) Shewanella sediminis sp. nov., a novel Na+-requiring and hexahydro-1,3,5-trinitro-1,3,5-triazine-degrading bacterium from marine sediment. Int J Syst Evol Microbiol 55(4):1511–1520
78	Zhao, S., Ding, C., He, J., 2016. Genomic characterization of Dehalococcoides mccartyi strain 11a5 reveals a circular extrachromosomal genetic element and a new tetra- chloroethene reductive dehalogenase gene. FEMS Microbiol. Ecol. 93. http://dx.doi. org/10.1093/femsec/ﬁw235.

## Sheet: Table S5
	Table S5. Reductive dechlorination of three chiral PCBs in the 135 sediment-free PCB/PCE-dechlorinating cultures
Provinces/Municipalities	Samplesb	PCB174a		PCB149		PCB135		PCB91		PCB183a		PCB154		PCB149		PCB132a		PCB91
		Molar percentage	EF Value	Molar percentage	EF Value	Molar percentage	EF Value	Molar percentage	EF Value	Molar percentage	EF Value	Molar percentage	EF Value	Molar percentage	EF Value	Molar percentage	EF Value	Molar percentage	EF Value
Hainan	HK1	0.59791	0.48402			0.40209	0.55637
	HK2	0.9071	0.5007	0.0929	0.71512											0.87033	0.52684	0.12967	0.63983
	HK3	0.69523	0.49009			0.30477	0.53005
Guangdong	GZ1	0.8123	0.48605			0.1877	0.55203			0.85033	0.5429	0.11704	0.5	0.03263	0.2624
	GZ2	0.80364	0.47461			0.19636	0.69689
	GZ3	0.49251	0.48885			0.50749	0.52984
	GZ4	0.85579	0.50988			0.14421	0.53397			0.92183	0.55499	0.07817	0.5
	GZ5	0.75976	0.49136	0.02226	0.62041	0.21798	0.5404									0.96077	0.50853	0.03923	0.66598
	GZ6	0.96804	0.50815			0.03196	0.56919			0.9491	0.49236	0.0509	0.5
	GZ7	0.22807	0.4889			0.77193	0.50816			0.97173	0.50733	0.02827	0.5
	GZ8									0.97242	0.51153	0.02758	0.5
	GZ10	0.52385	0.3274			0.47615	0.79723
	QY2	0.5847	0.52205	0.24577	0.57823	0.16953	0.55417			0.79812	0.40017	0.20188	0.5
	QY3	0.96145	0.53711			0.03855	0.4975
	QY4	0.78797	0.52776	0.15563	0.55698	0.0564	0.48753			0.98341	0.49409	0.01659	0.5
	ZJ3	0.46459	0.56598	0.16318	0.61306	0.35124	0.34507	0.021	0.2658	0.44578	0.52586	0.55422	0.5			0.85115	0.52885	0.14885	0.62082
	YJ1	0.10147	0.44901			0.89853	0.49733			0.90799	0.53459	0.09201	0.5
	YJ3	0.85453	0.48901			0.14547	0.50005
	ST1	0.68457	0.49889			0.31543	0.5384
	ST2	0.96793	0.49691	0.01804	0.41547	0.01403	0.51604
	SZ
	HZ	0.58468	0.46001			0.41532	0.55634
Guangxi	NN1	0.34092	0.48522			0.65908	0.50948
	NN3
	GG	0.95548	0.5007	0.03558	0.41647	0.00894	0.53181			0.96555	0.49379	0.03445	0.5
Fujian	FZ1	0.91626	0.49209			0.08374	0.52532
	FZ2	0.26974	0.4582			0.73026	0.50968			0.65961	0.67985	0.18705	0.5	0.15334	0.50975
	FZ4	0.20536	0.45955	0.01933	0.51812	0.77531	0.5003			0.8557	0.53738	0.08931	0.5	0.05499	0.32669
	XM3	0.2703	0.462			0.7297	0.51345			0.90462	0.53702	0.09538	0.5
	LY	0.86368	0.50237	0.02923	0.49355	0.06286	0.42758	0.04422	0.64456							0.98224	0.50347	0.01776	0.64456
	ZZ
Jiangxi	NC1
	NC2	0.49554	0.32622			0.50446	0.79276
	NC4	0.7699	0.4987			0.2301	0.52958
	NC7	0.2744	0.33995			0.7256	0.60104			0.89717	0.5226	0.06986	0.5	0.03297	0.20736
Jiangsu	NJ1									0.73394	0.50344	0.13741	0.5	0.12865	0.2358
	NJ2	0.66041	0.5162			0.33959	0.4387
	NJ3															0.98813	0.50625	0.01187	0.6609
	YZ1	0.55942	0.47993			0.44058	0.52018
	YZ3
	YZ4	0.19114	0.18656	0.0183	0.56736	0.79057	0.62121			0.76745	0.62269	0.23255	0.5
	WX1	0.57783	0.35623			0.42217	0.78517			0.81017	0.53593	0.10604	0.5	0.0838	0.20254
	WX2	0.2154	0.45389			0.7846	0.51024			0.83366	0.54322	0.1235	0.5	0.04284	0.23534
	XZ1	0.07064	0.38331			0.92936	0.47367
	XZ2	0.63547	0.41433			0.36453	0.69036
Shanghai	SH1	0.58977	0.41474			0.41023	0.68474
	SH3	0.5064	0.41401	0.05551	0.49505	0.43809	0.66206			0.95666	0.49835	0.00986	0.5	0.03348	0.37293
Yunnan	KM1	0.0419	0.38161			0.9581	0.49181			0.74914	0.58322	0.1623	0.5	0.08856	0.31271
	KM2	0.69471	0.48504	0.06134	0.50281	0.24396	0.52118
	KM3	0.23642	0.45558			0.76358	0.50439			0.85445	0.53557	0.0878	0.5	0.05775	0.31064
	YX1	0.18292	0.45434			0.81708	0.50487			0.76759	0.58675	0.17953	0.5	0.05288	0.32066
	YX2	0.11138	0.43487			0.88862	0.50485			0.88461	0.53312	0.07756	0.5	0.03782	0.27429
Guizhou	AS2	0.33719	0.44935			0.66281	0.51428			0.77121	0.66131	0.1284	0.5	0.1004	0.33871
	AS3	0.1439	0.59221	0.18849	0.29475	0.66761	0.44137									0.6901	0.54062	0.3099	0.59893
Sichuan	CD1
	CD2	0.05838	0.6269	0.08529	0.70542	0.85634	0.50592			0.7896	0.53981	0.11908	0.5	0.09132	0.40759
	CD3	0.34649	0.39614			0.65351	0.58232			0.96623	0.50593	0.03377	0.5
	CD4	0.9511	0.48827			0.0489	0.54495			0.95022	0.49653	0	0.5	0.04978	0.48633
	CD6	0.20535	0.48878	0.03418	0.53139	0.76047	0.50229			0.8449	0.53709	0.07502	0.5	0.08008	0.27186
	NJ1	0.45455	0.47545			0.54545	0.51799			0.95927	0.51275	0.04073	0.5
	NJ2
	GY1	0.77058	0.51053	0.1147	0.50052	0.08064	0.55254	0.03408	0.62087	0.93803	0.50513	0.00447	0.5	0.05749	0.3209
Chongqing	CQ1	0.19374	0.47557			0.80626	0.50365			0.90223	0.52112	0.06554	0.5	0.03223	0.32311
	CQ2	0.70197	0.48803			0.29803	0.51778			0.70226	0.56099	0.13728	0.5	0.16046	0.19114
	CQ3	0.82524	0.48715			0.17476	0.53307
Hunan	CS1
	CS2	0.81802	0.44775			0.18198	0.82295
	HY1	0.34111	0.48052	0.01115	0.5503	0.64774	0.49948			0.85263	0.51218	0.08203	0.5	0.06534	0.68301
	HY2	0.40947	0.52091	0.08599	0.29413	0.50455	0.418									0.77297	0.54427	0.22703	0.65898
	YZ2	0.23914	0.46603	0.00601	0.54063	0.75486	0.51321			0.92884	0.53081	0.07116	0.5
	YY1	0.89218	0.50612	0.0526	0.58907	0.05522	0.40396			0.87356	0.51062	0.12644	0.5			0.92374	0.51739	0.07626	0.73646
	YY2
Hubei	WH1	0.49911	0.48996	0.01852	0.39281	0.48237	0.50219
	WH2	0.91765	0.48858	0.02262	0.48831	0.05973	0.52133
	WH3									0.94297	0.53051	0.02279	0.5	0.03424	0.32266
	JZ1	0.83548	0.49681	0.0273	0.26305	0.13722	0.51678			0.94147	0.49502	0.05853	0.5
	JZ2	0.21333	0.53199	0.63853	0.53886	0.14814	0.61511			0.69081	0.28088	0.30919	0.5			0.84723	0.5742	0.15277	0.67613
	SZ1	0.71987	0.49107	0.0117	0.53791	0.26843	0.50809
	SZ2	0.95759	0.49796	0.01788	0.44998	0.02453	0.49898
Anhui	HF	0.01349	0.5061	0.02463	0.31569	0.96188	0.48565			0.60678	0.51208	0.27831	0.5	0.11491	0.16286
	WH1	0.56613	0.51468	0.04358	0.45639	0.39028	0.44952									0.9445	0.51393	0.0555	0.6856
	WH2	0.93204	0.50159	0.03194	0.50836	0.03602	0.49171
	WH3	0.94594	0.496			0.05406	0.49244
	FY	0.26485	0.11898			0.73515	0.66114			0.88354	0.51815	0.11646	0.5
	MAS	0.19038	0.32426			0.80962	0.54507
Henan	ZZ1	0.42119	0.5			0.57881	0.50034			0.92704	0.51226	0.0383	0.5	0.03466	0.26779
	ZZ2									0.7975	0.29346			0.2025	0.83655
	XY3	0.7502	0.50067			0.2498	0.52635			0.65336	0.71617	0.17257	0.5	0.17407	0.50311
	XY4	0.8844	0.5101	0.02235	0.38627	0.09325	0.45886
	AY	0.73708	0.49983	0.02249	0.45534	0.14702	0.4503	0.09341	0.69086							0.94312	0.5082	0.05688	0.65622
	KF1	0.63537	0.4593	0.13699	0.30258	0.22764	0.51987			0.76149	0.73777	0.23851	0.5
	KF2	0.40403	0.51091			0.59597	0.48351
Gansu	LZ1
	LZ3
	TS1	0.06282	0.44755	0.09935	0.11345	0.83783	0.46735			0.67315	0.29419	0.32685	0.5			0.81808	0.41721	0.18192	0.04426
	TS2	0.3525	0.56113	0.21229	0.35129	0.43521	0.39528									0.86103	0.52494	0.13897	0.58088
	ZY1	0.29329	0.50526	0		0.70671	0.48834			0.64583	0.75904	0.14623	0.5	0.20794	0.32171
Ningxia	WZ1	0.07901	0.56965	0.21389	0.36887	0.7071	0.45986									0.70948	0.53663	0.29052	0.55575
	SZS									0.93587	0.54575	0.06413	0.5
Inner Mongolia	HS2	0.7984	0.48777			0.2016	0.52279
	HS3	0.95718	0.49189			0.04282	0.53603
	BT1	0.31956	0.50713			0.68044	0.49679			0.89067	0.5184	0.05103	0.5	0.05831	0.17453
	BT2
	BY1	0.36385	0.23656			0.63615	0.73594
Shaanxi	WN	0.61581	0.43185	0.2005	0.1831	0.18369	0.51045			0.55513	0.05374	0.44487	0.5			0.98208	0.48744	0.01792	0.13269
Shanxi	TY1	0.44273	0.49202			0.55727	0.49236			0.97763	0.50782	0.02237	0.5
	TY2	0.84617	0.49469			0.15383	0.51751
	TY3	0.50757	0.48798			0.49243	0.50621			0.76498	0.50069	0.23502	0.5
Shandong	JN4	0.51774	0.38065			0.48226	0.69961
	QD1									0.94847	0.49201	0.05153	0.5
	HZ1	0.60512	0.45936	0.39488	0.79836					0.93509	0.51307	0.06491	0.5			0.65672	0.66155	0.34328	0.76057
	HZ2	0.9262	0.48498	0.0738	0.24736					0.85493	0.4533	0.14507	0.5			0.98738	0.49819	0.01262	0.10062
	HZ3	0.58284	0.47347	0.31771	0.77433			0.09945	0.39766	0.90843	0.50158	0.09157	0.5			0.79809	0.59238	0.20191	0.76217
	LY	0.79523	0.53339	0.05992	0.38761	0.14486	0.35862			0.94472	0.48957	0.05528	0.5
Hebei	SJZ1	0.64669	0.48326			0.35331	0.51479
	SJZ2	0.53522	0.5067	0.04268	0.16772	0.40696	0.46117	0.01515	0.67667
	QHD
Beijing	BJ2
	BJ3	0.8836	0.48043	0.07133	0.19358	0.04507	0.52441			0.69338	0.33856	0.30662	0.5			0.95875	0.4859	0.04125	0.07301
	BJ4	0.96459	0.49824			0.03541	0.53016			0.87952	0.50212	0.01018	0.5	0.1103	0.21848
	TZ2	0.26221	0.49376			0.73779	0.49699			0.8907	0.53046	0.08441	0.5	0.02488	0.23615
Tianjin	TJ1	0.27222	0.1803			0.72778	0.68146
	TJ2	0.88115	0.49594	0.11885	0.56722
Liaoning	SY1
	SY2	0.84838	0.52406	0.13513	0.48851			0.01649	0.71655	0.8906	0.49556			0.1094	0.51434
	SY3
	YK1	0.60242	0.51735	0.0487	0.51424	0.34888	0.43906			0.8446	0.50858	0.1554	0.5			0.95867	0.50969	0.04133	0.68936
	YK2	0.68123	0.47715			0.31877	0.53419			0.96024	0.51686	0.03976	0.5
Jilin	JL1	0.46493	0.54192	0.11881	0.40224	0.41627	0.37691			0.31907	0.45057	0.68093	0.5			0.87662	0.51094	0.12338	0.95745
	JL2
	CC1	0.94281	0.49463	0.05719	0.49924
	CC2
	CC3
	CC4	0.6737	0.4942			0.3263	0.49479
	SP	0.35272	0.4991			0.64728	0.50661			0.75904	0.50229	0.24096	0.5			0.97339	0.50561	0.02661	0.72532
Note: The numbers showed molar percentages (MP) of the three chiral PCBs (i.e., PCB174, PCB183, PCB132) and their dechlorination products in the in vitro test. Blanks represent no PCB dechlorination activity was detected. EF(Enantiomeric fraction) value: < 0.491, EF = 0.491~0.509, EF >0.509 are marked in blue, white and pink, respectively.
athe concentrations of PCB183, PCB174 and PCB132 amended in medium are 2.53, 2.53 and 2.77 µM, respectively;
brefer sample abbreviations in Table S2.
